# Supplementary material for: Inhibitory effects of Trichoderma asperellum culture filtrates on pathogenic bacteria, Burkholderia pseudomallei
Source: PeerJ. 2025 Feb 28;13:e19051. doi: 10.7717/peerj.19051 (PMC11874947; doi:10.7717/peerj.19051)
Supplement: Supplemental Information 1 — The data are represented as the mean ± standard error (SE) from six replicates. Different superscript letters indicate statistically significant differences as determined by Tukey–Kramer test at p < 0.05. [file peerj-13-19051-s001.xlsx]

## Sheet: Final agardiffusion
	Antibacterial activity of T. asperellum culture filtrates collected at different time points against B. pseudomallei K96243 assessed by zone of inhibition measurements
		inhibition zone (mm.)
	T. asperellum culture filtrates	1	2	3	4	5	6	mean	SE
	Day 3	19	20	19	18	18	22	19.3333	0.561084
	Day 5	28	27	30	23	24	23	25.8333	1.09079
	Day 7	31	30	31	30	30	30	30.3333	0.19245
	Day 9	19	19	20	26	25	26	22.5	1.30703
	Day 11	20	22	22	15	13	15	17.8333	1.4798
	Day 14	21	23	22	20	20	20	21	0.471405
	30 μg CAZ	38	37	38	38	38	37	37.6667	0.19245
	Distilled water	0	0	0	0	0	0	0	0
