# Supplementary material for: Inhibitory effects of Trichoderma asperellum culture filtrates on pathogenic bacteria, Burkholderia pseudomallei
Source: PeerJ. 2025 Feb 28;13:e19051. doi: 10.7717/peerj.19051 (PMC11874947; doi:10.7717/peerj.19051)
Supplement: Supplemental Information 2 — Different lines with symbols show results from different TD7 concentrations: untreated control (pink solid line with diamonds), treated with 7.81 mg/mL (green dash-dotted line with squares), 15.62 mg/mL (blue dotted line with circles), 31.24 mg/mL (yellow dashed line with squares) and 62.48 mg/mL (red dashed line with triangles) of TD7. The data are presented as the means ± standard error (SE) from three replicates. [file peerj-13-19051-s002.xlsx]

## Sheet: Time kill assay Final   
Time-kill assay with B. pseudomallei K96243 and varying concentrations of TD7.
	Number of colony (repilcate 1)						Number of colony (repilcate 2)						Number of colony (repilcate 3)							Average number of conoly (3 replicates)
time (hours)	untreated control	7.8mg/mL (1xMIC)	15.6 mg/mL (2xMIC)	31.2mg/mL (4xMIC)	62.5mg/mL (8xMIC)		untreated control	7.8mg/mL (1xMIC)	15.6 mg/mL (2xMIC)	31.2mg/mL (4xMIC)	62.5mg/mL (8xMIC)		untreated control	7.8mg/mL (1xMIC)	15.6 mg/mL (2xMIC)	31.2mg/mL (4xMIC)	62.5mg/mL (8xMIC)		time (hours)	untreated control	7.8mg/mL (1xMIC)	15.6 mg/mL (2xMIC)	31.2mg/mL (4xMIC)	62.5mg/mL (8xMIC)
0	212000	212000	212000	212000	212000		150000	150000	150000	150000	150000		220000	220000	220000	220000	220000		0	194000	194000	194000	194000	194000
0.5	212000	218000	150000	4700	1		150000	150000	110000	4570	1		210000	230000	82300	3520	1		0.5	190667	199333	114100	4263.33	1
2	262000	178000	1	1	1		1230000	138000	1	1	1		723000	219000	1	1	1		2	738333	178333	1	1	1
4	1970000	170000	1	1	1		7400000	115000	1	1	1		5400000	91500	1	1	1		4	4.92333e+06	125500	1	1	1
24	1.37e+10	1	1	1	1		9700000000	1	1	1	1		17000000000	1	1	1	1		24	1.34667e+10	1	1	1	1
	*1 = no colony						*1 = no colony						*1 = no colony						*1 = no colony
																				Average log 10 number of colony (3 replicates)
	Log 10 number of colony (repilcate 1)						Log 10 number of colony (repilcate 2)						Log 10 number of colony (repilcate 3)							untreated control		7.8mg/mL (1xMIC)		15.6 mg/mL (2xMIC)		31.2mg/mL (4xMIC)		62.5mg/mL (8xMIC)
time (hours)	untreated control	7.8mg/mL (1xMIC)	15.6 mg/mL (2xMIC)	31.2mg/mL (4xMIC)	62.5mg/mL (8xMIC)		untreated control	7.8mg/mL (1xMIC)	15.6 mg/mL (2xMIC)	31.2mg/mL (4xMIC)	62.5mg/mL (8xMIC)		untreated control	7.8mg/mL (1xMIC)	15.6 mg/mL (2xMIC)	31.2mg/mL (4xMIC)	62.5mg/mL (8xMIC)		time (hours)	mean	SE	mean	SE	mean	SE	mean	SE	mean	SE
0	5.32634	5.32634	5.32634	5.32634	5.32634		5.17609	5.17609	5.17609	5.17609	5.17609		5.34242	5.34242	5.34242	5.34242	5.34242		0	5.28162	0.0529666	5.28162	0.0529666	5.28162	0.0529666	5.28162	0.0529666	5.28162	0.0529666
0.5	5.32634	5.33846	5.17609	3.6721	0		5.17609	5.17609	5.04139	3.65992	0		5.32222	5.36173	4.9154	3.54654	0		0.5	5.27488	0.0494097	5.29209	0.0583881	5.04429	0.0752691	3.62619	0.0399764	0	0
2	5.4183	5.25042	0	0	0		6.08991	5.13988	0	0	0		5.85914	5.34044	0	0	0		2	5.78911	0.197011	5.24358	0.057999	0	0	0	0	0	0
4	6.29447	5.23045	0	0	0		6.86923	5.0607	0	0	0		6.73239	4.96142	0	0	0		4	6.63203	0.173343	5.08419	0.0785448	0	0	0	0	0	0
24	10.1367	0	0	0	0		9.98677	0	0	0	0		10.2304	0	0	0	0		24	10.118	0.0709649	0	0	0	0	0	0	0	0
