# Supplementary material for: Inhibitory effects of Trichoderma asperellum culture filtrates on pathogenic bacteria, Burkholderia pseudomallei
Source: PeerJ. 2025 Feb 28;13:e19051. doi: 10.7717/peerj.19051 (PMC11874947; doi:10.7717/peerj.19051)
Supplement: Supplemental Information 3 — Each treatment included 24 replicates, comprising eight technical replicates from three independent experiments. Each point in the scatter plot represents an individual replicate, while horizontal lines indicate the mean, and vertical lines represent the standard error (SE). Statistically significant differences were determined using the Tukey–Kramer test at p < 0.05, denoted by different letters. [file peerj-13-19051-s003.xlsx]

## Sheet: Biofilm test Final
	Quantitative analysis of B. pseudomallei H777 biofilm formation following treatment with TD7 during the adhesion stage and biofilm formation stage
			OD620 nm X5 dilution factor
			adhesion (0 hours)			biofilm formation (24 hours)
		Replicates	Untreated control	3.91 mg/mL	7.81 mg/mL	Untreated control	3.91 mg/mL	7.81 mg/mL
	Exp.1	1	1.795	0.44	0.315	1.025	1.16	0.68
		2	1.575	0.4	0.325	1.205	0.94	0.64
		3	2.63	0.4	0.315	1.155	1.335	0.61
		4	4.675	0.385	0.31	2.945	1.92	0.605
		5	0.945	0.38	0.33	0.89	1.32	0.555
		6	2.095	0.405	0.325	1.655	0.92	0.61
		7	2.435	0.375	0.325	1.315	3.38	0.54
		8	1.4	0.405	0.34	0.94	1.135	0.555
	Exp.2	9	1.21	0.72	0.305	1.03	1.185	0.485
		10	1.29	1.21	0.305	1.445	3.95	0.585
		11	1.57	1.415	0.315	1.59	0.995	0.495
		12	0.995	5.23	0.295	1.045	0.915	0.48
		13	0.915	1.635	0.3	0.82	0.84	0.435
		14	1.695	2.155	0.3	1.58	0.795	0.455
		15	2.495	0.925	0.3	0.925	1.29	0.48
		16	1.69	1.13	0.295	1.17	3.165	0.535
	Exp.3	17	3.65	4.25	0.375	2.675	3.85	0.505
		18	2.815	1.86	0.365	2.72	1.43	0.735
		19	3.08	3.7	0.6	2.8	2.345	0.6
		20	2.1	4.8	0.355	2.485	1.82	0.545
		21	3.32	5.03	0.39	2.405	2.04	0.61
		22	2.46	3.575	0.34	3.255	1.54	0.61
		23	1.72	4.205	0.36	2.945	1.215	0.625
		24	3.2	4.675	0.365	3.175	1.615	0.75
		Mean	2.15646	2.07104	0.339583	1.79979	1.7125	0.571875
		SE	0.194252	0.368586	0.0126295	0.174331	0.193953	0.0168239
	Fold different			1.04124	6.35031		1.05097	3.14718
