# Supplementary material for: Inhibitory effects of Trichoderma asperellum culture filtrates on pathogenic bacteria, Burkholderia pseudomallei
Source: PeerJ. 2025 Feb 28;13:e19051. doi: 10.7717/peerj.19051 (PMC11874947; doi:10.7717/peerj.19051)
Supplement: Supplemental Information 4 — The data are presented as the means ± standard error (SE) from six replicates. [file peerj-13-19051-s004.xlsx]

## Sheet: MIC-MBC Final
	Minimum inhibitory concentrations (MICs) and minimum bactericidal concentrations (MBCs) of T. asperellum culture filtrate against B. pseudomallei
	Strain		1	2	3	4	5	6	mean	SE
	K96243	MIC (mg/mL)	7.8125	7.8125	7.8125	7.8125	7.8125	7.8125	7.8125	0
		MBC (mg/mL)	7.8125	7.8125	7.8125	7.8125	7.8125	7.8125	7.8125	0
	H777	MIC (mg/mL)	7.8125	7.8125	7.8125	7.8125	7.8125	7.8125	7.8125	0
		MBC (mg/mL)	15.625	15.625	15.625	7.8125	7.8125	7.8125	11.7188	1.74693
