# Supplementary material for: Inhibitory effects of Trichoderma asperellum culture filtrates on pathogenic bacteria, Burkholderia pseudomallei
Source: PeerJ. 2025 Feb 28;13:e19051. doi: 10.7717/peerj.19051 (PMC11874947; doi:10.7717/peerj.19051)
Supplement: Supplemental Information 5 — Two different concentrations of TD7 (3.91 mg/mL - blue bar and 7.81 mg/mL - green bar) were tested. Untreated cells (pink bar) were used as a negative control and 0.25M EDTA-treated cells (yellow bar) were used as a positive control. The data are presented as the means ± standard error (SE) from at least four replicates. Different letters indicate statistically significant differences by Tukey–Kramer test at p < 0.05. [file peerj-13-19051-s005.xlsx]

## Sheet: Crystalviolet uptake Final
	Crystal violet uptake (%) by B. pseudomallei K96243 cells treated with different concentrations of TD7
		OD 590 nm
		1	2	3	4	5	6	Mean	SE
	Untreated	0.0817	0.0867	0.07	0.0779	na	na	0.079075	0.00352098
	3.91 mg/mL	0.1005	0.1004	0.101	0.1151	0.1113	0.1127	0.106833	0.002818
	7.81 mg/mL	0.1736	0.1741	0.1735	0.1496	0.1474	0.1437	0.160317	0.00604987
	0.25M EDTA	0.1937	0.1771	0.1752	0.18	na	na	0.1815	0.00418469
	crystal violet	0.5513	0.5383	0.5356	0.6752	0.6727	0.6707	0.6073	0.0294081
		% CV uptake
		1	2	3	4	5	6	Mean	SE
	Untreated	14.8195	16.1063	13.0695	11.5373	na	na	13.8831	0.999334
	3.91 mg/mL	18.2296	18.6513	18.8574	17.0468	16.5453	16.8033	17.689	0.411839
	7.81 mg/mL	31.4892	32.3426	32.3936	22.1564	21.9117	21.4254	26.9531	2.29638
	0.25M EDTA	35.1351	32.8999	32.711	26.6588	na	na	31.8512	1.81623
	crystal violet	100	100	100	100	100	100	100	0
